# Supplementary material for: Insecticide-Driven Patterns of Genetic Variation in the Dengue Vector Aedes aegypti in Martinique Island
Source: PLoS One. 2013 Oct 18;8(10):e77857. doi: 10.1371/journal.pone.0077857 (PMC3799629; doi:10.1371/journal.pone.0077857)
Supplement: Table S4 — Genes up to 500 kb each direction from the SNP. (XLSX) [file pone.0077857.s004.xlsx]

## Sheet: Feuil1
Table S4 : Genes up to 500 kb each direction from the SNP
SNP (supercontig_gene*)	Associated resistance phenotype	Gene	Function	Position from the SNP	Alleles	aa change
1.1168_AAEL014562_A*	Deltamethrin	AAEL014562	60S ribosomal protein L12	intron 2	[T/C]
		AAEL014564	conserved hypothetical protein	15940 bp down
		AAEL014566	wingless	63927 bp down
		AAEL014565	hypothetical protein	101110 bp up
		AAEL014563	hypothetical protein	150656 bp up
1.1168_AAEL014562_B*	Deltamethrin	AAEL014562	60S ribosomal protein L12	exon 3	[C/T]
		AAEL014564	conserved hypothetical protein	15895 bp down
		AAEL014566	wingless	63970 bp down
		AAEL014565	hypothetical protein	101153 bp up
		AAEL014563	hypothetical protein	150699 bp up
1.541_AAEL011089*	Deltamethrin	AAEL011089	ribonucleoprotein	3' UTR	[G/C]
		AAEL011105	adducin	3647 bp down
		AAEL011098	conserved hypothetical protein	29655 bp up
		AAEL011110	conserved hypothetical protein	33583 bp up
		AAEL011090	complement component	52587 bp down
		AAEL011096	viral IAP-associated factor, putative	65536 bp down
		AAEL011101	conserved hypothetical protein	66749 bp up
		AAEL011097	conserved hypothetical protein	71317 bp up
		AAEL011100	hypothetical protein	88091 bp down
		AAEL011102	lysosomal-associated transmembrane protein	89653 bp down
		AAEL011092	conserved hypothetical protein	94371 bp up
		AAEL011093	homer	132031 bp down
		AAEL016986	Novel protein coding	135062 bp up
		AAEL011099	molybdopterin-binding	147695 bp down
		AAEL011107	hypothetical protein	156235 bp down
		AAEL011095	n-acetylgalactosaminyltransferase2	168411 bp down
		AAEL011091	retinal degeneration b beta	174300 bp down
		AAEL011103	centromere/kinetochore protein zw10	199022 bp up
		AAEL011106	hypothetical protein	234201 bp up
		AAEL011094	conserved hypothetical protein	283894 bp up
		AAEL011104	conserved hypothetical protein	383929 bp down
		AAEL011108	protein phosphatase 2c 2	490632 bp down
1.68_AAEL002794	Deltamethrin	AAEL002794	hypothetical protein	485 bp down	[A/C]
		AAEL002813	coupling factor, putative	125301 bp up
		AAEL002800	DNA polymerase epsilon, catalytic subunit	146894 bp down
		AAEL002785	DNA polymerase epsilon subunit b	165964 bp up
		AAEL002798	conserved hypothetical protein	194338 bp down
		AAEL002787	conserved hypothetical protein	250442 bp up
		AAEL002784	zinc finger protein	254676 bp up
		AAEL002802	WD-repeat protein1	264776 bp down
		AAEL002809	down syndrome critical region protein	306954 bp up
		AAEL002792	dynein light chain	317113 bp down
		AAEL002775	conserved hypothetical protein	338185 bp down
		AAEL002808	diphthine synthase	366275 bp up
		AAEL002786	hypothetical protein	402046 bp up
		AAEL002817	conserved hypothetical protein	468887 bp down
1.250_AAEL007363	Deltamethrin	AAEL007363	leucine-rich transmembrane protein	206 bp down	[G/T]
		AAEL007364	7,8-dihydro-8-oxoguanine-triphosphatase	60717 bp up
		AAEL007353	cullin	85999 bp up
		AAEL007351	conserved hypothetical protein	108591 bp down
		AAEL007357	conserved hypothetical protein	114587 bp up
		AAEL007355	mitochondrial ribosomal protein, S18A, putative	115916 bp up
		AAEL007356	conserved hypothetical protein	152890 bp up
		AAEL007360	lethal(3)malignant brain tumor D96	153204 bp down
		AAEL007352	hypothetical protein	174272 bp up
		AAEL007354	pseudouridylate synthase	174284 bp down
		AAEL007358	hypothetical protein	184194 bp up
		AAEL007362	regulator of g protein signaling	332779 bp up
		AAEL007361	conserved hypothetical protein	360202 bp up
		AAEL007350	hormonereceptor-like in 83, Nuclear receptor 1	377252 bp down
		AAEL007359	retinal guanylate cyclase	429421 bp down
1.70_AAEL002875	Deltamethrin	AAEL002875	conserved hypothetical protein	exon + 3'UTR	[A/C]
		AAEL002859	hypothetical protein	556 bp up
		AAEL002873	conserved hypothetical protein	75510 bp down
1.4_AAEL000245	Deltamethrin	AAEL000245	conserved hypothetical protein	exon 3	[C/T]
		AAEL000255	conserved hypothetical protein	24201 bp up
		AAEL000228	leucine rich repeat containing 16, putative	45627 bp up
		AAEL000240	conserved hypothetical protein	48009 bp down
		AAEL016023	Novel tRNA	100137 bp down
		AAEL000220	conserved hypothetical protein	114711 bp up
		AAEL000227	ClassB Scavenger Receptor (CD36 domain)	158412 bp up
		AAEL000256	ClassB Scavenger Receptor (CD36 domain)	270766 bp up
		AAEL000234	ClassB Scavenger Receptor (CD36 domain)	352838 bp up
		AAEL000235	hypothetical protein	392914 bp down
		AAEL000226	conserved hypothetical protein	438454 bp up
		AAEL000246	GPCR Frizzled/Smoothened Family	465007 bp down
1.636_NA0299*	Temephos	-	-	381176	[T/C]
		AAEL017741	Novel miRNA 1	102249 bp down
		AAEL011946	hypothetical protein	103348 bp down
		AAEL011945	conserved hypothetical protein	186382 bp up
		AAEL011948	conserved hypothetical protein	291229 bp up
		AAEL011947	conserved hypothetical protein	361223 bp up
		AAEL017200	Novel protein coding	370798 bp down
1.1002_AAEL014080*	Temephos	AAEL014080	Aldehyde deshydrogenase 2	exon 4 + 3'UTR	[A/G]
		AAEL014082	odorant-binding protein 56a, putative	10734 bp up
		AAEL016896	Novel tRNA	38042 bp up
		AAEL014081	conserved hypothetical protein	56929 bp up
1.83_AAEL003298	Temephos	AAEL003298	alkaline phosphatase 2	exon 2	[A/T]	Thr-->Ser
		AAEL003317	alkaline phosphatase 2	1737 bp down
		AAEL003297	alkaline phosphatase 2	3716 bp down
		AAEL003286	alkaline phosphatase 2	4108 bp down
		AAEL003313	alkaline phosphatase 2	7395 bp up
		AAEL003289	alkaline phosphatase 2	9466 bp up
		AAEL003301	MRAS2, putative	61107 bp up
		AAEL003309	alkaline phosphatase 2	26817 bp up
		AAEL017178	odorant receptor	137775 bp up
		AAEL003294	fibrinogen and fibronectin	141152 bp down
		AAEL017123	odorant receptor	142643 bp down
		AAEL003308	trypsin, putative	156437 bp down
		AAEL017733	Novel rRNA	183185 bp down
		AAEL003305	conserved hypothetical protein	226776 bp up
		AAEL003296	conserved hypothetical protein	245652 bp up
		AAEL003288	mitochondrial uncoupling protein, putative	275866 bp down
		AAEL003324	acidic ribosomal protein P1, putative	278204 bp up
		AAEL003314	hypothetical protein	302837 bp down
		AAEL003300	hypothetical protein	314528 bp down
		AAEL003302	conserved hypothetical protein	320974 bp up
		AAEL003310	conserved hypothetical protein	321322 bp up
		AAEL003293	GTP-binding protein	330351 bp down
		AAEL003320	conserved hypothetical protein	343532 bp down
1.414_AAEL009633	Temephos	AAEL009633	conserved hypothetical protein	exon 2	[G/A]
		AAEL017570	novel protein coding	1287 bp up
		AAEL009643	conserved hypothetical protein	183419 bp up
		AAEL009644	conserved hypothetical protein	197224 bp down
		AAEL009642	cathepsin b	372972 bp down
		AAEL009641	ladybird homeobox corepressor 1	487124 bp up
1.355_AAEL008898	Temephos	AAEL008898	sulfotransferase 2	exon 3	[T/G]	Lys-->Asp
		AAEL008905	host cell factor C1	17403 bp up
		AAEL008902	cation-transporting ATPase fly	17993 bp down
		AAEL008893	xaa-pro dipeptidase pepd/pepq (e.coli)	62950 bp down
		AAEL008901	conserved hypothetical protein	71496 bp up
		AAEL008903	zinc finger protein	72686 bp down
		AAEL008895	conserved hypothetical protein	83794 bp up
		AAEL008892	hypothetical protein	137476 bp down
		AAEL008900	p15-2a protein, putative	184509 bp up
		AAEL017248	Novel protein coding	260168 bp down
		AAEL008894	conserved hypothetical protein	361034 bp down
		AAEL008899	conserved hypothetical protein	393892 bp up
		AAEL008896	hypothetical protein	401502 bp up
		AAEL008897	conserved hypothetical protein	402387 bp up
		AAEL008904	coagulation factor X, putative	495311 bp down
*SNPs located less than 500Kb from the end (or start) of the supercontig
1 proteins potentially involved in the regulation of transcription.
2 enzymes potentially involved in the detoxication of xenobiotic components.
